# Supplementary material for: Large, old pools of carbon and microbial communities are present deep in soils under a temperate planted forest
Source: Copernicus journal article supplement (doi:10.5194/egusphere-2022-689), 2022-09-01
Supplement: Supplementary file 1 [file egusphere-2022-689-supplement.zip]

Archive with 3 entries (3 files):
- Supplementary_Files/Supplementary_Figures.pdf
- Supplementary_Files/Supplementary_Methods.pdf
- Supplementary_Files/Supplementary_Tables.xlsx
