# Supplementary material for: Large, old pools of carbon and microbial communities are present deep in soils under a temperate planted forest
Source: Copernicus journal article supplement (doi:10.5194/egusphere-2022-689), 2022-09-01
Supplement: Supplementary file 1 [file Supplementary_Tables.xlsx]

## Sheet: Cover sheet
	Supplementary Tables: Large, old pools of carbon and microbial communities are present deep in soils under a temperate planted forest
	Authors: Alexa K. Byers1, Loretta G. Garrett2, Charlotte Armstrong3, Fiona Dean2, Steve A Wakelin3
	Affiliation: 1Bioprotection Aotearoa, PO Box 85084, Lincoln University, Lincoln, 8014, New Zealand 2 Scion, PO Box 29237, Riccarton, Christchurch 8440, New Zealand. 3 Scion, Private Bag 3020, Rotorua 3046, New Zealand.
	Corresponding author: Alexa K. Byers, alexa.byers@lincoln.ac.nz

## Sheet: Table A.1
Table A.1. Mean ± SD soil parameters calculated for each depth increment. Soil chemical parameters that share common letters between depth increments indicate those which had non-significant differences (p>0.05) when tested using pairwise Wilcoxon rank sum tests.
Depth (cm)	pH	Total C (Mg ha-1)	Total N (kg ha-1)	C:N ratio	Bray P (kg ha-1)	Exchangeable cations (kg ha-1)				Total bulk density (g cm-3)	δ13C [‰]	Δ14C [‰]	CRA [yBP]
						K	Ca	Mg	Na
0 to 10	4.78 ± 0.34 a	31.16 ± 7.07 a	1.85 ± 0.34 a	16.78 ± 1.52 a	0.008 ± 0.004	93.30 ± 90.50	733.00 ± 415.00 ab	285.10 ± 193.60 ab	7.95 ± 8.71	0.41 ± 0.04 a	-27.83 ± 0.60 a	39.25 ± 29.44	>Modern
10 to 20	5.21 ± 0.26 ab	20.74 ± 5.79 ab	1.36 ± 0.43 ab	15.48 ± 2.16 ab	0.007 ± 0.005	63.10 ± 38.20	746.90 ± 299.60 a	231.80 ± 139.90 a	6.32 ± 6.88	0.50 ± 0.13 ab	-27.01 ± 0.48 ab	17.31 ± 16.50	>Modern
20 to 30	5.32 ± 0.30 ab	15.65 ± 8.69 bc	1.02 ± 0.38 bc	15.24 ± 4.93 abc	0.008 ± 0.004	38.71 ± 30.66	647.00 ± 318.00 a	154.10 ± 122.90 ab	3.67 ± 2.93	0.57 ± 0.17 ab	-26.10 ± 0.41 cd	-66.57 ± 43.26	491.67 ± 374.76
30 to 40	5.32 ± 0.21 b	9.65 ± 4.48 cd	0.77 ± 0.29 bc	12.85 ± 3.83 abc	0.004 ± 0.007	29.72 ± 28.52	523.00 ± 317.00 ab	116.50 ± 104.90 ab	2.92 ± 2.94	0.63 ± 0.14 b	-25.75 ± 0.43 c	-85.21 ± 46.90	655 ± 411.69
40 to 50	5.28 ± 0.19 ab	5.93 ± 3.79 cde	0.57 ± 0.31 c	11.14 ± 3.81 bc	0.004 ± 0.005	20.59 ± 16.79	401.30 ± 285.60 ab	76.70 ± 72.80 ab	2.21 ± 1.67	0.59 ± 0.13 b	-25.88 ± 0.67 bcd	-99.72 ± 33.86	780 ± 303.36
50 to 60	5.31 ± 0.15 b	4.86 ± 3.53 de	0.47 ± 0.30 c	11.11 ± 3.76 bc	0.005 ± 0.005	17.49 ± 18.37	278.10 ± 209.70 ab	57.90 ± 61.80 b	1.97 ± 1.94	0.54 ± 0.13 ab	-26.18 ± 1.24 abcd	-126.06 ± 42.98	1023.33 ± 396.20
60 to 70	5.32 ± 0.17 b	3.94 ± 2.03 e	0.41 ± 0.24 c	11.40 ± 4.44 bc	0.004 ± 0.005	14.00 ± 14.94	216.30 ± 199.40 b	38.60 ± 44.60 b	2.23 ± 2.23	0.51 ± 0.11 ab	-26.19 ± 0.96 abcd	-136.16 ± 36.84	1138.75 ± 397.42
70 to 80	5.32 ± 0.18 ab	4.90 ± 4.37 cde	0.45 ± 0.33 c	10.76 ± 4.03 bc	0.003 ± 0.005	24.51 ± 27.16	364.00 ± 352.00 ab	86.50 ± 99.70 ab	3.40 ± 3.60	0.52 ± 0.10 ab	-26.93 ± 0.63 abd	-157.44 ± 19.37	1309.29 ± 185.37
80 to 90	5.39 ± 0.17 b	4.33 ± 2.76 de	0.46 ± 0.36 c	10.13 ± 4.36 bc	0.003 ± 0.005	30.20 ± 31.90	438.00 ± 388.00 ab	111.40 ± 114.90 ab	4.45 ± 3.76	0.52 ± 0.14 ab	-26.77 ± 0.73 abd	-171.82 ± 21.25	1447.86 ± 207.06
90 to 100	5.41 ± 0.21 b	4.19 ± 3.37 de	0.44 ± 0.38 c	9.59 ± 3.35 c	0.001 ± 0.003	25.74 ± 28.87	376.00 ± 382.00 ab	97.70 ± 111.80 ab	3.48 ± 3.93	0.47 ± 0.11 ab	-26.23 ± 1.08 abcd	-189.96 ± 32.00	1570.83 ± 316.28

## Sheet: Table A.2
Table A.2. Friedman test results used to identify significant differences in soil chemical properties by soil depth
	Friedman chi-squared	P-value
pH	31.733	0.0002214
Total C (Mg ha-1)	65.411	1.2e-10
Total N (kg ha-1)	60.464	1.091e-09
C:N ratio	54.911	1.266e-08
Bray P (kg ha-1)	16.196	0.06289
Exch K (kg ha-1)	27.775	0.00104
Exch Ca (kg ha-1)	36.196	3.659e-05
Exch Mg (kg ha-1)	39.513	9.309e-06
Exch Na (kg ha-1)	24.72	0.003297
Bulk density (g cm-3)	24.248	0.003925
δ13C [‰]	20.417	0.0155

## Sheet: Table A.3
Table A.3. The total C stock (Mg ha-1) allocated to each depth increment across the 10 sampling transect positions. Also presented is the % of total C stored within each depth increment relative to the sum of C calculated for the whole 1 metre soil profile. Calculated C stocks (Mg ha-1) were obtained from total C (%) measurements in fine groud >2 mm and <2 mm carbon fractions.
	0m		2m		4m		6m		8m		10m		12m		14m		16m		18m
Soil depth (cm)	C (Mg ha-1)	% C stock	C (Mg ha-1)	% C stock	C (Mg ha-1)	% C stock	C (Mg ha-1)	% C stock	C (Mg ha-1)	% C stock	C (Mg ha-1)	% C stock	C (Mg ha-1)	% C stock	C (Mg ha-1)	% C stock	C (Mg ha-1)	% C stock	C (Mg ha-1)	% C stock	**only included transects where there were no NA's present when calculating average
0 to 10	35.2163	20.0574	37.5552	31.9976	22.7561	26.9229	27.7479	34.875	26.374	28.3212	21.4117	17.3086	44.8327	35.5011	32.6238	43.8423	30.2701	34.3286	32.7861	36.1129
10 to 20	24.4848	13.9453	23.3657	19.9079	20.603	24.3755	7.82976	9.84086	18.855	20.247	19.8583	16.0529	26.3717	20.8827	20.3993	27.4141	16.9429	19.2145	28.734	31.6497
20 to 30	34.0563	19.3968	10.7524	9.16117	11.8492	14.0189	7.42113	9.32727	12.8646	13.8144	25.9083	20.9435	20.7612	16.4399	7.00188	9.40963	11.3044	12.8201	14.5505	16.0269
30 to 40	15.7585	8.97522	9.49541	8.09022	6.21547	7.35358	5.59317	7.02979	9.0287	9.69527	17.3137	13.9959	12.047	9.53953	3.69144	4.96082	11.2027	12.7047	6.16566	6.79129
40 to 50	13.6708	7.78619	3.43514	2.92679	3.41412	4.03927	6.0082	7.55143	5.35941	5.75508	11.6283	9.40001	5.61482	4.44614	2.3378	3.14171	5.05184	5.72918	2.77453	3.05606
50 to 60	10.6871	6.08685	2.06635	1.76056	3.62464	4.28834	2.14962	2.70176	6.08484	6.53408	11.6111	9.38609	3.42822	2.71467	2.12811	2.85991	4.08529	4.63304	2.70942	2.98435
60 to 70	8.15437	4.64431	5.32987	4.54112	2.93118	3.46791	1.81158	2.27689	4.80769	5.16264	5.22904	4.227	3.50961	2.77911	2.99224	4.02118	3.58294	4.06334	1.0912	1.20192
70 to 80	13.2319	7.53621	12.0737	10.2869	1.10034	1.30182	6.0633	7.62068	3.93354	4.22394	3.81002	3.07991	3.4686	2.74664	1.83842	2.4706	2.7855	3.15897	0.742979	0.818369
80 to 90	8.67687	4.9419	6.37734	5.43358	5.5734	6.59394	7.49136	9.41555	3.79714	4.07747	3.57983	2.89383	4.44027	3.51607	0.829813	1.11516	2.13148	2.41727	0.349679	0.38516
90 to 100	11.6405	6.62986	6.91789	5.89414	6.45564	7.63772	7.44773	9.36072	2.01984	2.16896	3.35521	2.71225	1.81104	1.43409	0.568997	0.764659	0.820233	0.930209	0.883728	0.9734
% below 30cm		46.6006		38.9333		34.6826		45.9568		37.6174		45.695		27.1763		19.334		33.6367		16.2105

## Sheet: Table A.4
Table A.4. The 16S copy numbers (standardised by per ng DNA) quantified for each depth increment across the 10 sampling transect positions. Also shown is the % of 16S copies allocated to each depth increment relative to the total ITS copy number calculated for the whole 1 metre soil profile. These values were used to estimate changes in bacterial biomass with soil depth.
	0m		2m		4m		6m		8m		10m		12m		14m		16m		18m
Soil depth (cm)	16S: copies/ng DNA	% total	16S: copies/ng DNA	% total	16S: copies/ng DNA	% total	16S: copies/ng DNA	% total	16S: copies/ng DNA	% total	16S: copies/ng DNA	% total	16S: copies/ng DNA	% total	16S: copies/ng DNA	% total	16S: copies/ng DNA	% total	16S: copies/ng DNA	% total	**only included transects where there were no NA's present when calculating average
0 to 10	5.84392e+06	15.5189	9.52839e+06	21.1471	8.64474e+06	20.4187	8.38366e+06	34.9419	7.9267e+06	15.2586	7.96913e+06	13.678	9.59831e+06	22.2592	9.42698e+06	41.3225	7.78172e+06	26.9504	7.88555e+06	35.1645
10 to 20	5.9371e+06	15.7663	9.13782e+06	20.2803	8.06956e+06	19.0601	4.12154e+06	17.178	8.4401e+06	16.2468	8.5756e+06	14.719	7.6099e+06	17.6479	5.45705e+06	23.9206	5.62321e+06	19.4748	4.30043e+06	19.1772
20 to 30	5.2097e+06	13.8347	6.40369e+06	14.2122	5.80596e+06	13.7136	538302	2.24356	5.72336e+06	11.0172	8.6601e+06	14.864	5.9637e+06	13.8302	5.73477e+06	25.138	7.3631e+06	25.5006	3.51338e+06	15.6674
30 to 40	5.83945e+06	15.507	6.23267e+06	13.8327	4.16553e+06	9.8389	291696	1.21575	5.50474e+06	10.5964	8.00668e+06	13.7425	2.17558e+06	5.04532	1.61043e+06	7.05921	7.70029e+06	26.6684	5.10912e+06	22.7834
40 to 50	5.42318e+06	14.4016	6.12097e+06	13.5848	4.89245e+06	11.5559	1.36007e+06	5.66858	4.89188e+06	9.41666	6.40206e+06	10.9884	8.18419e+06	18.9797	364888	1.59946	159813	0.553478	894045	3.98688
50 to 60	5.40918e+06	14.3644	6.86925e+06	15.2455	5.58249e+06	13.1857	9.08683e+06	37.8726	7.41143e+06	14.2667	4.76558e+06	8.17954	7.44509e+06	17.2657	59666.9	0.261546	95916.7	0.332188	595831	2.65703
60 to 70	3.84848e+06	10.2199	592164	1.31424	4.68278e+06	11.0606	121173	0.505033	7.94075e+06	15.2856	1.82456e+06	3.13163	315883	0.732556	94572.6	0.414552	99604.6	0.34496	27294.3	0.121715
70 to 80	599.403	0.00159175	52581.2	0.116698	428311	1.01166	35101.5	0.146298	2.65603e+06	5.11276	7.87493e+06	13.5164	4984.19	0.0115587	64834.5	0.284197	34565.7	0.119711	64641.6	0.28826
80 to 90	137644	0.365522	106651	0.236698	62112.7	0.146709	46699.2	0.194636	1.45419e+06	2.79925	3.55319e+06	6.09862	1.80839e+06	4.19379	N/A	N/A	N/A	N/A	N/A	N/A
90 to 100	7563.69	0.0200858	13428.9	0.0298039	3456.87	0.00816506	8096.3	0.0337442	N/A	N/A	630359	1.08193	14660.3	0.0339983	N/A	N/A	16023.3	0.0554933	34421.2	0.153497
% below 30cm		54.8801		44.3603		46.8076		45.6366		57.4774		56.739		46.2627		9.61896		28.0742		29.9908

## Sheet: Table A.5
Table A.5. The ITS copy numbers (standardised by per ng DNA) quantified for each depth increment across the 10 sampling transect positions. Also shown is the % of ITS copies allocated to each depth increment relative to the total ITS copy number calculated for the whole 1 metre soil profile. These values were used to estimate changes in fungal biomass with soil depth.
	0m		2m		4m		6m		8m		10m		12m		14m		16m		18m
Soil depth (cm)	ITS: copies/ng DNA	% total	ITS: copies/ng DNA	% total	ITS: copies/ng DNA	% total	ITS: copies/ng DNA	% total	ITS: copies/ng DNA	% total	ITS: copies/ng DNA	% total	ITS: copies/ng DNA	% total	ITS: copies/ng DNA	% total	ITS: copies/ng DNA	% total	ITS: copies/ng DNA	% total	**only included transects where there were no NA's present when calculating average
0 to 10	253996	29.6141	442489	41.7712	289627	24.724	208452	65.8384	168444	34.4677	211855	24.4868	270029	45.3646	223023	65.6064	289849	60.1892	271887	75.7516
10 to 20	105986	12.3572	183423	17.3152	144603	12.3441	28955.8	9.14553	129086	26.414	137036	15.839	120322	20.2139	81518	23.98	70396.8	14.6184	64705.8	18.0279
20 to 30	146239	17.0503	87447.6	8.2551	72345.3	6.17575	272.336	0.0860159	38231.4	7.82307	308170	35.6193	20427.3	3.43178	33573.3	9.87618	75922.8	15.7659	12068.7	3.36251
30 to 40	144954	16.9006	121374	11.4578	165316	14.1122	202.4	0.063927	92730	18.9748	56457.9	6.52558	6427.66	1.07984	1204.29	0.354263	44771.4	9.29711	8641.18	2.40755
40 to 50	100804	11.753	206968	19.5379	269092	22.971	25.8671	0.00817	21806.4	4.46212	40218.9	4.64862	109823	18.4502	336.199	0.0988992	232.855	0.048354	747.389	0.208233
50 to 60	73804.7	8.60509	17248.5	1.62827	162334	13.8577	78492.4	24.7914	22950.7	4.69626	56552.3	6.53649	66395.6	11.1544	105.663	0.0310828	201.704	0.0418854	705.602	0.196591
60 to 70	31648	3.68993	6.01837	0.000568137	67598	5.7705	120.06	0.0379203	11171.7	2.286	11807.9	1.36479	217.206	0.0364905	165.703	0.0487446	95.9232	0.0199191	50.4977	0.0140694
70 to 80	N/A	N/A	269.004	0.0253941	468.922	0.0400294	26.4785	0.0083631	1676.36	0.343023	40081.3	4.63272	53.6055	0.00900568	15.1141	0.00444608	46.1848	0.00959061	73.228	0.0204023
80 to 90	244.832	0.0285456	52.3972	0.00494633	35.887	0.00306349	54.6349	0.0172561	2605.03	0.533051	2637.09	0.304803	1488.74	0.250107	N/A	N/A	N/A	N/A	N/A	N/A
90 to 100	10.5104	0.00122543	37.4233	0.00353278	20.615	0.0017598	9.56497	0.00302105	N/A	0	362.412	0.0418886	56.9773	0.00957213	N/A	N/A	46.157	0.00958483	39.8907	0.0111141
% below 30cm		40.9784		32.6584		56.7562		24.9301		31.2952		24.0549		30.9897		0.537436		9.42644		2.85796

## Sheet: Table A.6
Table A.6. Mean ± SD values for 16S/ITS species diversity, 16S functional diversity, and 16S/ITS copy number grouped according to soil depth increment.
	16S								ITS								16S MetaCyc pathways
	Chao1		Shannon		Evenness		log [copies per ng DNA]		Chao1		Shannon		Evenness		log [copies per ng DNA]		Chao1		Shannon		Evenness
Depth	N	Mean	N	Mean	N	Mean	N	Mean	N	Mean	N	Mean	N	Mean	N	Mean	N	Mean	N	Mean	N	Mean
0 to 10	10	947.37 ± 193.49	10	6.09 ± 0.21	10	0.90 ± 0.01	10	15.92 ± 0.15	10	151.13 ± 35.09	10	3.35 ± 0.26	10	0.68 ± 0.05	10	12.45 ± 0.26	10	396.05 ± 9.63	10	5.42 ± 0.02	10	0.91 ± 0.00
10 to 20	10	1060.87 ± 149.72	10	6.14 ± 0.19	10	0.89 ± 0.01	10	15.68 ± 0.29	10	140.98 ± 28.47	10	3.40 ± 0.19	10	0.69 ± 0.03	10	11.47 ± 0.54	10	394.66 ± 8.51	10	5.39 ± 0.02	10	0.90 ± 0.00
20 to 30	10	897.92 ± 229.71	10	5.87 ± 0.25	10	0.88 ± 0.02	11	15.15 ± 1.01	9	92.76 ± 18.26	9	2.93 ± 0.21	9	0.65 ± 0.04	11	9.97 ± 2.38	10	391.99 ± 10.30	10	5.36 ± 0.03	10	0.90 ± 0.00
30 to 40	10	711.26 ± 209.96	10	5.50 ± 0.24	10	0.85 ± 0.03	11	14.84 ± 1.22	9	51.13 ± 24.37	9	2.14 ± 0.52	9	0.60 ± 0.11	11	9.48 ±2 .57	10	382.28 ± 9.03	10	5.33 ± 0.02	10	0.90 ± 0.01
40 to 50	10	575.46 ± 257.75	10	5.18 ± 0.58	10	0.85 ± 0.04	10	14.57 ± 1.32	9	32.53 ± 20.54	9	1.72 ± 0.83	9	0.52 ± 0.19	10	8.96 ± 3.35	10	371.4 ± 26.51	10	5.32 ± 0.05	10	0.90 ± 0.01
50 to 60	10	565.46 ± 374.13	10	4.85 ± 1.37	10	0.85 ± 0.06	11	14.69 ± 1.87	8	43.13 ± 19.50	8	1.99 ± 0.89	8	0.52 ± 0.20	11	9.46 ± 2.65	10	340.12 ± 55.86	10	5.29 ± 0.07	10	0.91 ± 0.02
60 to 70	10	380.53 ± 347.68	10	4.27 ± 1.62	10	0.85 ± 0.05	11	13.03 ± 1.91	5	28.95 ± 14.56	5	1.60 ± 0.96	5	0.45 ± 0.26	11	6.41 ± 3.07	10	334.73 ± 63.85	10	5.31 ± 0.05	10	0.92 ± 0.03
70 to 80	9	232.60 ± 260.31	9	3.70 ± 1.69	9	0.80 ± 0.17	10	11.18 ± 2.65	6	7.5 ± 9.20	6	0.65 ± 0.66	6	0.31 ± 0.28	10	5.11 ± 2.43	9	324 ± 57.57	9	5.30 ± 0.08	9	0.92 ± 0.02
80 to 90	7	316.13 ± 367.20	7	3.86 ± 1.71	7	0.84 ± 0.05	9	12.45 ± 1.81	3	7 ± 2	3	0.91 ± 0.19	3	0.51 ± 0.18	9	5.32 ± 1.86	7	312.5 ± 67.81	7	5.29 ± 0.05	7	0.92 ± 0.03
90 to 100	8	189.73 ± 322.41	8	3.10 ± 1.55	8	0.84 ± 0.05	8	9.74 ± 1.50	1	7 ± NA	1	0.63 ± NA	1	0.32 ± NA	8	3.37 ± 1.28	8	291 ± 57.25	8	5.28 ± 0.05	8	0.93 ± 0.02

## Sheet: Table A.7
Table A.7. Kruskal wallis results testing for differences in the alpha diversity of 16S/ITS communities and 16S MetaCyc pathways (obtained from Picrust analysis) by soil depth, transect position and PCR type. Also shown are the Kruskal Wallis test results for changes in 16S/ITS copy number by soil depth and transect position.
		16S		ITS		16S MetaCyc pathways
Metric	Factor	ChiSq	p-value	ChiSq	p-value	ChiSq	p-value
Chao1	Depth	57.4278	4.18458e-09	59.5795	1.61553e-09	57.4278	4.18458e-09
	Transect	9.74273	0.371712	9.51655	0.39102	9.74273	0.371712
	PCR	43.5133	4.21083e-11	26.0617	3.30686e-07	43.5133	4.21083e-11
Shannon	Depth	61.6965	6.30759e-10	58.3277	2.81197e-09	61.6965	6.30759e-10
	Transect	7.98949	0.535205	12.0482	0.210608	7.98949	0.535205
	PCR	41.5037	1.17649e-10	25.4269	4.59456e-07	41.5037	1.17649e-10
Evenness	Depth	29.1718	0.000606194	27.6854	0.00107641	29.1718	0.000606194
	Transect	7.05474	0.63142	21.8756	0.0092816	7.05474	0.63142
	PCR	3.36266	0.0666901	8.50674	0.00353834	3.36266	0.0666901
Log [copy number/ng DNA]	Depth	60.417	0	64.954	0
	Transect	14.534	0.105	16.772	0.052

## Sheet: Table A.8
Table A.8. The bacterial phyla identified by ANCOM-BC analysis to have a significant (bonferroni adjusted p<0.05) log fold change (beta value) between topsoils (0 to 30cm) and subsoils (30 to 100cm). Positive beta values indicate phyla with a higher abundance in subsoils, negative values are those with a lower abundance in subsoils.
Bacterial phyla	W	Beta value	SE	p.adj
Crenarchaeota	2.83165	1.14927	0.405866	0.138927
Microgenomates	1.59903	0.349442	0.218533	1
Fusobacteria	1.15799	0.2055	0.177463	1
Aenigmarchaeota	1.09037	0.172576	0.158273	1
Candidatus_Saccharibacteria	0.986373	0.189033	0.191645	1
Spirochaetes	0.899156	0.204941	0.227926	1
BRC1	0.556652	0.0909418	0.163373	1
Ignavibacteriae	0.324119	0.0526657	0.162489	1
Deferribacteres	0.0628187	0.0109069	0.173625	1
Pacearchaeota	0.00873778	0.00165496	0.189403	1
Elusimicrobia	-0.270507	-0.065869	0.243502	1
Parcubacteria	-0.533851	-0.128719	0.241114	1
Euryarchaeota	-0.733636	-0.270615	0.368868	1
Woesearchaeota	-0.812515	-0.218229	0.268584	1
Proteobacteria	-1.22682	-0.192718	0.157087	1
Acidobacteria	-1.33905	-0.193411	0.144438	1
Nitrospirae	-3.28248	-1.13382	0.345417	0.0308697
Planctomycetes	-3.37731	-0.916061	0.27124	0.0219594
Armatimonadetes	-3.88171	-0.858254	0.221102	0.00311174
Firmicutes	-4.17011	-0.98426	0.236027	0.000913344
Thaumarchaeota	-5.90714	-2.00771	0.339879	1.04427e-07
candidate_division_WPS-1	-6.60832	-1.62166	0.245397	1.16616e-09
candidate_division_WPS-2	-6.695	-2.54939	0.38079	6.4702e-10
Actinobacteria	-6.97091	-1.84221	0.26427	9.44666e-11
Latescibacteria	-7.76583	-2.13295	0.274658	2.43329e-13
Chloroflexi	-8.6901	-2.7713	0.318904	1.08639e-16
Verrucomicrobia	-9.26537	-2.22671	0.240326	5.83204e-19
Gemmatimonadetes	-10.3611	-2.66422	0.257138	1.11833e-23
Bacteroidetes	-12.9728	-3.21504	0.247829	5.237e-37
Chlamydiae	-15.0261	-3.01989	0.200976	1.48587e-49

## Sheet: Table A.9
Table A.9. The bacterial classes identified by ANCOM-BC analysis to have a significant (bonferroni adjusted p<0.05) log fold change (beta value) between topsoils (0 to 30cm) and subsoils (30 to 100cm). Positive beta values indicate classes with a higher abundance in subsoils, negative values are those with a lower abundance in subsoils.
Bacterial classes	W	Beta value	SE	p.adj
Chlamydiia	-11.0922	-2.38608	0.215114	1.21866e-26
Acidobacteria_Gp5	-9.13505	-2.25692	0.247062	5.81848e-18
Subdivision3	-9.10665	-2.50826	0.275432	7.56176e-18
Acidobacteria_Gp16	-8.8495	-1.83032	0.206827	7.82418e-17
Sphingobacteriia	-7.80203	-2.42083	0.310282	5.42184e-13
Gemmatimonadetes	-7.39778	-2.03041	0.274462	1.23245e-11
Cytophagia	-7.17946	-1.93751	0.269868	6.2288e-11
Bacteria_Chloroflexi_unknown	-6.81441	-1.8344	0.269194	8.42411e-10
Ktedonobacteria	-6.80904	-2.21808	0.325754	8.74429e-10
Spartobacteria	-6.6131	-1.62241	0.245333	3.34944e-09
Bacilli	-6.20428	-2.18672	0.352453	4.89046e-08
Acidobacteria_Gp1	-5.95346	-2.11929	0.355976	2.33657e-07
Acidobacteria_Gp3	-5.939	-1.86904	0.314706	2.55221e-07
Acidobacteria_Gp15	-5.40541	-1.20846	0.223565	5.75471e-06
Bacteria_Latescibacteria_unknown	-5.39285	-1.49914	0.277987	6.1719e-06
Bacteria_Bacteroidetes_unknown	-5.38914	-1.50226	0.278758	6.30094e-06
Bacteria_candidate_division_WPS-2_unknown	-4.90629	-1.91558	0.390434	8.26075e-05
Bacteroidia	-4.57379	-1.35769	0.296842	0.000426289
Actinobacteria	-4.35792	-1.20705	0.276979	0.0011686
Negativicutes	-4.09324	-1.22123	0.298353	0.00378598
Deltaproteobacteria	-3.96476	-1.43654	0.362328	0.00653893
Bacteria_candidate_division_WPS-1_unknown	-3.94944	-0.98785	0.250124	0.00697169
Nitrososphaerales	-3.57043	-1.2867	0.360376	0.0317194
Armatimonadetes_gp5	-3.52017	-1.0327	0.293367	0.0383829
Bacteria_Verrucomicrobia_unknown	-3.31956	-1.15403	0.347644	0.0802425
Alphaproteobacteria	-3.31597	-0.786681	0.23724	0.0812802
Flavobacteriia	-3.073	-0.977591	0.318122	0.188606
Acidobacteria_Gp22	-2.99144	-1.00294	0.335271	0.247125
Archaea_Thaumarchaeota_unknown	-2.77217	-1.23916	0.447001	0.495593
Bacteria_Actinobacteria_unknown	-2.73107	-0.908718	0.332734	0.561854
Bacteria_Proteobacteria_unknown	-2.61891	-0.768469	0.293431	0.785087
Verrucomicrobiae	-2.59388	-0.770998	0.297237	0.844597
Acidobacteria_Gp10	-2.4469	-0.773678	0.316187	1
Acidobacteria_Gp2	-2.39437	-0.784239	0.327535	1
Armatimonadia	-2.27086	-0.683367	0.300928	1
Acidobacteria_Gp4	-1.82367	-0.573484	0.314467	1
Nitrospira	-1.41062	-0.500015	0.354464	1
Acidobacteria_Gp13	-1.2065	-0.323423	0.268068	1
Planctomycetia	-1.08073	-0.293434	0.271515	1
Clostridia	-0.871638	-0.220245	0.25268	1
Opitutae	-0.0321281	-0.0114928	0.357716	1
Holophagae	-0.0245954	-0.00725263	0.294877	1
Anaerolineae	0.197514	0.071469	0.361843	1
Bacteria_Planctomycetes_unknown	0.222429	0.0526603	0.236751	1
Erysipelotrichia	0.334799	0.0757406	0.226227	1
Methanobacteria	0.447755	0.105703	0.236073	1
Archaea_Woesearchaeota_unknown	0.760322	0.189322	0.249003	1
Acidobacteria_Gp12	0.76454	0.262018	0.342713	1
Acidobacteria_Gp11	1.03234	0.319846	0.309825	1
Thermoplasmata	1.08891	0.425343	0.390615	1
Armatimonadetes_gp4	1.13134	0.33441	0.295586	1
Bacteria_Parcubacteria_unknown	2.14779	0.50509	0.235168	1
Acidobacteria_Gp7	2.22584	0.732233	0.32897	1
Bacteria_Acidobacteria_unknown	2.24177	0.65141	0.290578	1
Acidobacteria_Gp17	2.54003	0.954046	0.375604	0.986499
Chthonomonadetes	2.60337	0.851708	0.327155	0.82157
Elusimicrobia	2.64468	0.617128	0.233346	0.727728
Bacteria_Firmicutes_unknown	2.71	0.847894	0.312876	0.598819
Thermoleophilia	2.71995	0.903513	0.33218	0.581097
Gammaproteobacteria	3.45807	0.804584	0.232668	0.048421
Pacearchaeota_Incertae_Sedis_AR13	3.60113	0.635464	0.176462	0.028198
Caldilineae	3.62519	0.67546	0.186324	0.025699
Woesearchaeota_Incertae_Sedis_AR20	3.67172	0.579853	0.157924	0.021442
Spirochaetia	3.76662	0.83875	0.22268	0.0147273
Woesearchaeota_Incertae_Sedis_AR16	3.82091	0.586617	0.153528	0.0118336
Acidobacteria_Gp6	3.86566	0.944681	0.244378	0.0098601
Acidobacteria_Gp19	3.89376	0.780569	0.200466	0.00878437
Acidobacteria_Gp25	3.89782	0.630676	0.161802	0.00863868
Bacteria_Armatimonadetes_unknown	3.923	0.669448	0.170647	0.00778336
Endomicrobia	4.02166	0.669448	0.166461	0.00514333
Deferribacteres	4.04145	0.644716	0.159526	0.00472773
Thermoprotei	4.27773	1.78308	0.416829	0.00168042
Phycisphaerae	4.44715	0.807932	0.181674	0.000774442
Armatimonadetes_gp2	4.62511	0.692552	0.149738	0.000333218
Bacteria_Microgenomates_unknown	4.63447	0.983251	0.212161	0.000318494
Nitrosopumilales	4.65274	0.887168	0.190677	0.000291528
Bacteria_Candidatus_Saccharibacteria_unknown	4.67271	0.822843	0.176096	0.000264559
Ignavibacteria	4.71878	0.686475	0.145477	0.000211169
Acidobacteria_Gp20	4.794	1.46695	0.305997	0.000145502
Acidobacteria_Gp18	4.87071	1.35493	0.278179	9.89637e-05
Fimbriimonadia	4.93721	0.70958	0.143721	7.05308e-05
Bacteria_BRC1_unknown	4.96435	0.724751	0.145991	6.13498e-05
Fusobacteriia	5.11385	0.839309	0.164125	2.80941e-05
Betaproteobacteria	5.40095	1.12478	0.208256	5.89977e-06
Woesearchaeota_Incertae_Sedis_AR18	5.52589	0.778192	0.140826	2.91758e-06
Bacteria_Elusimicrobia_unknown	5.5332	0.773766	0.139841	2.79855e-06
Candidatus_Aenigmarchaeum	5.61384	0.806385	0.143642	1.76114e-06
Archaea_Euryarchaeota_unknown	6.56239	1.70013	0.259072	4.71278e-09
Woesearchaeota_Incertae_Sedis_AR15	6.86593	1.17212	0.170716	5.87937e-10

[truncated: 7 more sheets: Table A.10, Table A.11, Table A.12, Table A.13, Table A.14, Table A.15, Table A.16]
